# Supplementary material
Source: PubMed Central journal article supplement (PMC5302734)
Supplement: proteomes-02-00272-s001.pdf [file proteomes-02-00272-s001.pdf]

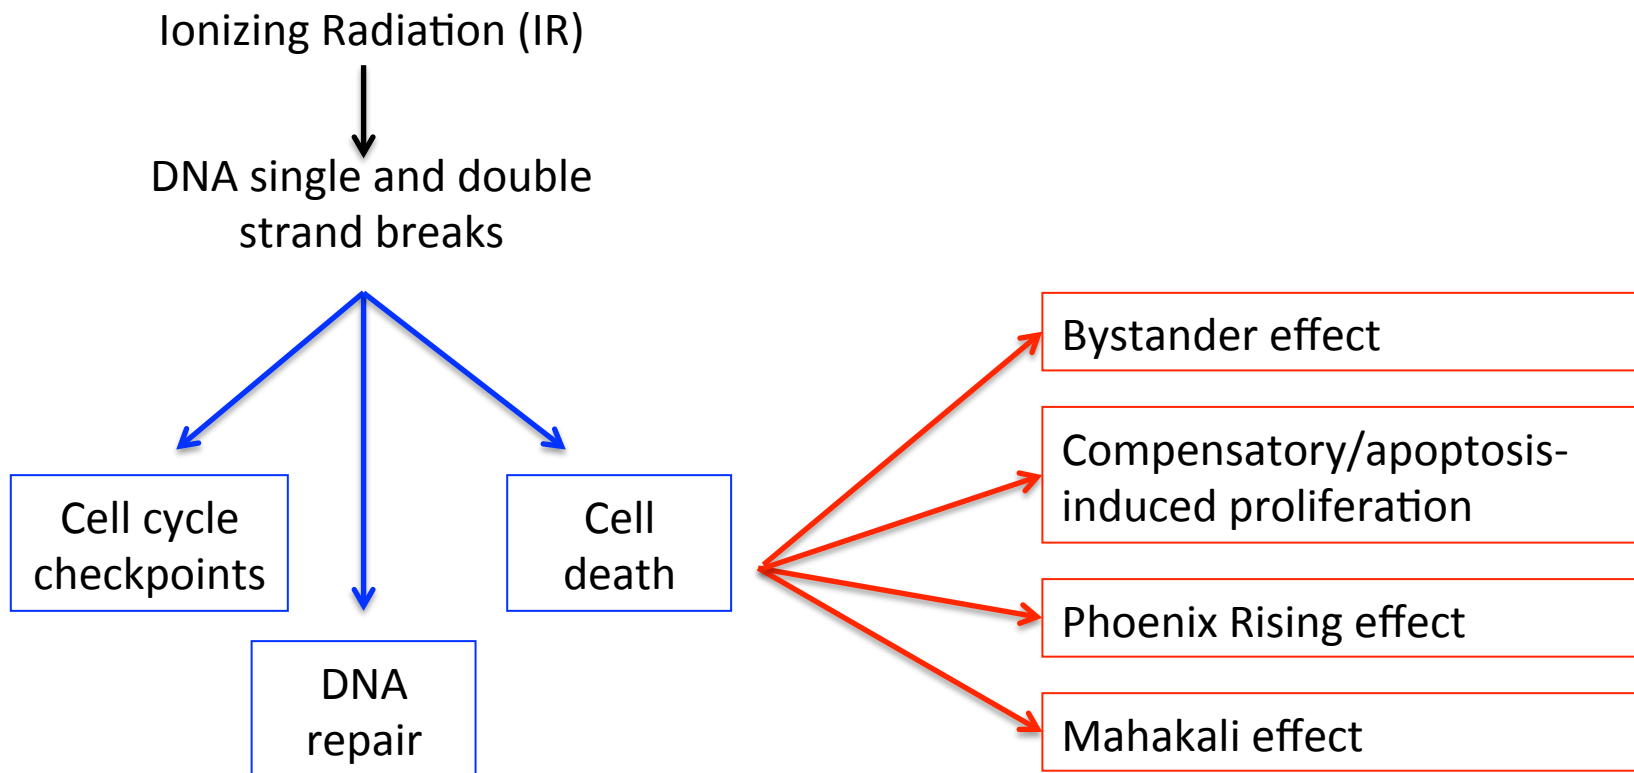

Stickel, Gomes and Su, Figure 1

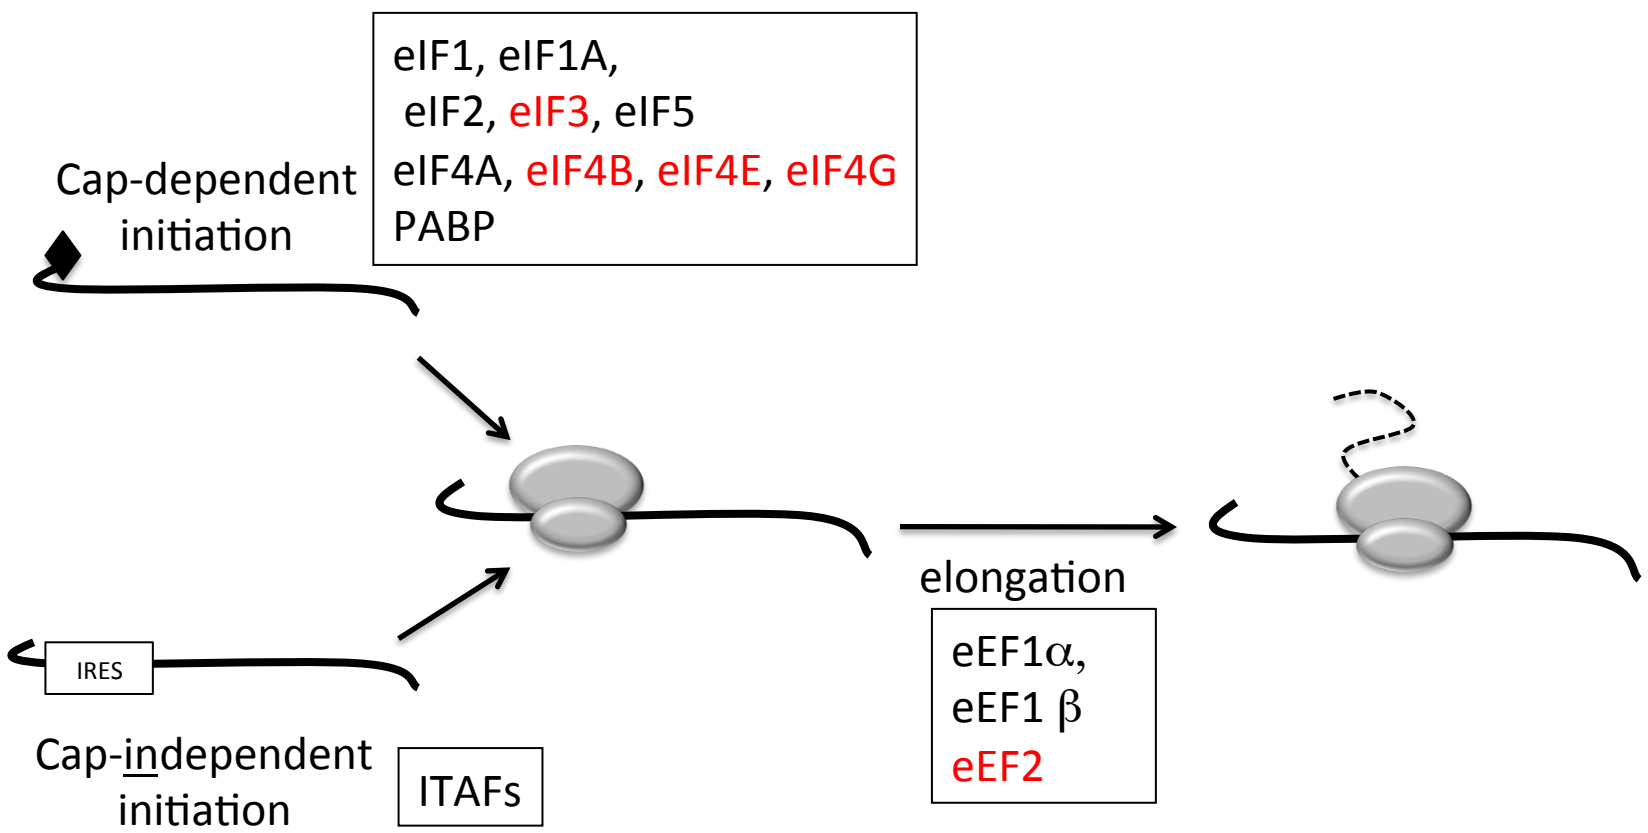

Stickel, Gomes and Su, Figure 2
